# Supplementary material for: Are Basic Substances a Key to Sustainable Pest and Disease Management in Agriculture? An Open Field Perspective
Source: MDPI journal article supplement (doi:10.3390/plants12173152), 2023-09-01
Supplement: s1 [file s1]

Table S1: Comprehensive resume of approved basic substances according to the European pesticide database (accessed 28 March 2023). Type of product that employed its function and situation of use are also reported.

| Approved basic substance           | Chemical family, group or nature | Type of product                                                     | Function of plant protection | Crop or situation                                            | FGI <sup>a</sup> | Pest or disease controlled                             | Way of application                       |
|------------------------------------|----------------------------------|---------------------------------------------------------------------|------------------------------|--------------------------------------------------------------|------------------|--------------------------------------------------------|------------------------------------------|
| <i>Allium cepa</i> L. bulb extract | Water extract from plant tissues | Dispersible concentrate (DC) obtained from decoction of crude onion | Fungicide                    | Potato ( <i>Solanum tuberosum</i> )                          | F                | Early blight                                           | Spray application                        |
|                                    |                                  |                                                                     |                              | Tomato ( <i>Solanum lycopersicum</i> )                       | FG               | Late Blight                                            |                                          |
|                                    |                                  |                                                                     |                              | Cucumber ( <i>Cucumis Sativus</i> )                          | FG               | Gray Mold                                              |                                          |
| Beer                               | Food product                     | Undiluted                                                           | Molluscicide                 | All edible and non-edible crops                              | F                | Pest slugs and snails                                  | Used in covered slug traps               |
| Calcium hydroxide                  | Inorganic salt (base)            | Liquid suspension (aqueous)                                         | Fungicide                    | Pome fruit                                                   | F                | <i>Neonectria galligena</i>                            | Splinker                                 |
|                                    |                                  |                                                                     |                              | Pome fruit and stone fruit                                   | F                | <i>N. galligena</i> and other diseases                 | Spray application                        |
|                                    |                                  |                                                                     |                              | Pome fruit and stone fruit                                   | F                | <i>N. galligena</i> and other diseases                 | Direct application on wounds and cancers |
| Chitosan                           | Polycationic polysaccharide      | Soluble powder (SP) to be diluted in water                          | Plant elicitor               | Olive trees ( <i>Olea europaea</i> )                         | F                | Plant resistance against pathogenic fungi and bacteria | Spray application                        |
|                                    |                                  |                                                                     |                              | Grapevine ( <i>Vitis vinifera</i> )                          | F                |                                                        |                                          |
|                                    |                                  |                                                                     |                              | Grass, grasslands and ornamental grasses                     | FG               |                                                        |                                          |
|                                    |                                  |                                                                     |                              | Grass (Sport fields, Golf courses)                           | FG               |                                                        |                                          |
|                                    |                                  |                                                                     |                              | Ornamental plants                                            | FGI              |                                                        |                                          |
|                                    |                                  |                                                                     |                              | Post-harvest fruit treatment                                 | FG               |                                                        | Immersion/dipping                        |
|                                    |                                  |                                                                     |                              | Fruits berries and small fruit, vegetables, cereals, spices, | FG               |                                                        | Low volume spray or dipping              |

|                        |                                                                                                                                                 |                                            |                        |                                                                                    |     |                                                                      |                             |
|------------------------|-------------------------------------------------------------------------------------------------------------------------------------------------|--------------------------------------------|------------------------|------------------------------------------------------------------------------------|-----|----------------------------------------------------------------------|-----------------------------|
|                        |                                                                                                                                                 |                                            |                        | crops for animal feed                                                              |     |                                                                      |                             |
|                        |                                                                                                                                                 |                                            |                        | Cereals, potatoes, sugar beet                                                      | FG  |                                                                      |                             |
| Chitosan hydrochloride | Linear polysaccharide composed of randomly distributed 1-4 linked D glucosamine and N-acetyl-D-glucosamine produced by de-acetylation of chitin | Soluble powder (SP) to be diluted in water | Plant elicitor         | Fruits berries and small fruit, vegetables, cereals, spices, crops for animal feed | FG  | It stimulates plant resistance against pathogenic fungi and bacteria | Low volume spray or dipping |
|                        |                                                                                                                                                 |                                            |                        | Cereals, potatoes, sugar beet                                                      | FG  |                                                                      |                             |
|                        |                                                                                                                                                 |                                            |                        | Ornamental bulbous                                                                 | FGI |                                                                      |                             |
|                        |                                                                                                                                                 |                                            |                        | Beet crops                                                                         | F   |                                                                      |                             |
| Clayed charcoal        | Mixture of charcoal and bentonite                                                                                                               | Granule (GR)                               | Protectant             | Grapevine ( <i>V. vinifera</i> )                                                   | F   | ESCA disease causing complex                                         | Soil burying                |
| Cow Milk               | Food product                                                                                                                                    | Soluble concentrate (SL)                   | Fungicide and virucide | Grapevine ( <i>V. vinifera</i> )                                                   | F   | Powdery mildews                                                      | Foliar application          |
|                        |                                                                                                                                                 |                                            |                        | Tomato ( <i>S. lycopersicum</i> )                                                  | G   |                                                                      |                             |
|                        |                                                                                                                                                 |                                            |                        | Gerbera ( <i>Gerbera jamesonii</i> )                                               | G   |                                                                      |                             |
|                        |                                                                                                                                                 |                                            |                        | Cucumber ( <i>C. sativus</i> ) and Zucchini squash ( <i>Cucurbita pepo</i> )       | G   |                                                                      |                             |
|                        |                                                                                                                                                 |                                            |                        | Soybean ( <i>Glycine max</i> )                                                     | F   |                                                                      |                             |
|                        |                                                                                                                                                 |                                            |                        | Glove fingertips and mechanical cutting tools                                      |     | Viruses                                                              | Dipping                     |
| Diammonium phosphate   | Inorganic salt                                                                                                                                  | Soluble powder (SP) to be diluted in water | Insect attractant      | Orchards, including cherry tree and <i>Prunus spp.</i>                             | F   | Mediterranean fruit fly, cherry fly                                  | Placed in physical traps    |
|                        |                                                                                                                                                 |                                            |                        | Olive trees ( <i>O. europaea</i> )                                                 | F   | Olive fly                                                            |                             |

|                             |                                  |                                                                                                                                |                |                                         |                                                     |                                            |                                           |
|-----------------------------|----------------------------------|--------------------------------------------------------------------------------------------------------------------------------|----------------|-----------------------------------------|-----------------------------------------------------|--------------------------------------------|-------------------------------------------|
|                             |                                  |                                                                                                                                |                | <i>Citrus spp.</i>                      | F                                                   | Mediterranean fruit fly                    |                                           |
|                             |                                  |                                                                                                                                |                | Other crops                             | F                                                   | Mediterranean fruit fly                    |                                           |
| <i>Equisetum arvense</i> L. | Water extract from plant tissues | Dispersible concentrate (DC) obtained from decoction of <i>Equisetum arvense</i> L. dry plant (2 g/L in the final preparation) | Fungicide      | Fruit trees (apple tree and peach tree) | F                                                   | Foliar fungi like scab and peach leaf curl | Foliar application                        |
|                             |                                  |                                                                                                                                |                | Grapevine ( <i>V. vinifera</i> )        | F                                                   | Downy and powdery mildews                  |                                           |
|                             |                                  |                                                                                                                                |                | Cucumber ( <i>C. sativus</i> )          | G                                                   | Powdery mildews and root rot fungi         |                                           |
|                             |                                  |                                                                                                                                |                | Tomato ( <i>S. lycopersicum</i> )       | F                                                   | Early blight and <i>Septoria</i> blight    |                                           |
|                             |                                  | Strawberry ( <i>Fragaria x ananassa</i> ) and Raspberry ( <i>Rubus idaeus</i> )                                                |                | FG                                      | Grey mold, powdery mildew, red core and other fungi |                                            |                                           |
|                             |                                  | Potato ( <i>S. tuberosum</i> )                                                                                                 |                | FG                                      | Late blight, early blight and powdery mildew        |                                            |                                           |
|                             |                                  | Cucumber ( <i>C. sativus</i> )                                                                                                 |                | GF                                      | Powdery mildes, root rot fungi and seedling blight  | Dry, Included in mulch                     |                                           |
|                             |                                  | Tomato ( <i>S. lycopersicum</i> )                                                                                              |                | F                                       | Early blight and <i>Septoria</i> blight             |                                            |                                           |
|                             |                                  | Ornamental plants (including <i>Prunus</i> spp.)                                                                               |                | FG                                      | Rose black spot, rose rust and leaf curl            |                                            |                                           |
| Fructose                    | Monosaccharide                   | Soluble powder (SP) to be diluted in water                                                                                     | Plant elicitor | Apple trees ( <i>Malus spp.</i> )       | F                                                   | Fruits borer like codling moth             | Foliar application (early in the morning) |
|                             |                                  |                                                                                                                                |                | Maize ( <i>Zea mays</i> )               | F                                                   | Symphylans                                 |                                           |
|                             |                                  |                                                                                                                                |                | Grapevine ( <i>V. vinifera</i> )        | F                                                   | Vine leafhopper                            |                                           |

|                   |                         |                                                                                                |                           |                                                            |    |                                           |                              |
|-------------------|-------------------------|------------------------------------------------------------------------------------------------|---------------------------|------------------------------------------------------------|----|-------------------------------------------|------------------------------|
|                   |                         |                                                                                                |                           | Grapevine ( <i>V. vinifera</i> )                           | F  | Downy mildew                              |                              |
| Hydrogen peroxide | Peroxide                | Liquid for disinfection of agricultural mechanical cutting tools                               | Fungicide and bactericide | Vegetables, Solanaceae spp.                                | G  | Soil bacteria, grey mold                  | Apply before cutting         |
|                   |                         | Liquid for seed treatment (LS)                                                                 |                           | Lettuce ( <i>Lactuca sativa</i> ) and horticulture flowers | FG | Bacterial leaf spot and pathogenic fungi  | Seed treatment before sowing |
| L-cysteine        | Proteinogenic aminoacid | To be used in a mixture with matrix (wheat flour, food grade) at a concentration of maximum 8% | Insecticide               | All crops and forestry (in tropical areas)                 | F  | Leaf cutting ants                         | Hand-held spreader           |
| Lecithins         | Food additive           | Emulsifiable concentrate (EC)                                                                  | Fungicide                 | Fruit trees (apple tree and peach tree)                    | FG | Powdery mildews                           | Spray application            |
|                   |                         |                                                                                                |                           | Gooseberry ( <i>Ribes uva-crispa</i> )                     | FG |                                           |                              |
|                   |                         |                                                                                                |                           | Market vegetables (e.g. <i>C. sativus</i> )                | FG |                                           |                              |
|                   |                         |                                                                                                |                           | Lettuce ( <i>Lactuca sativa</i> )                          | FG |                                           |                              |
|                   |                         |                                                                                                |                           | Mash ( <i>Valerianella locusta</i> )                       | FG |                                           |                              |
|                   |                         |                                                                                                |                           | Tomato ( <i>S. lycopersicum</i> )                          | FG | Late blight                               |                              |
|                   |                         |                                                                                                |                           | Endive ( <i>Cichorium endivia</i> )                        | FG | <i>Alternaria cichorii</i>                |                              |
|                   |                         |                                                                                                |                           | Ornamentals (especially roses)                             | FG | Powdery mildews and other fungal diseases |                              |
|                   |                         |                                                                                                |                           | Grapevine ( <i>V. vinifera</i> )                           | F  | Downy and powdery mildews                 |                              |

|                           |                                  |                                                         |                             |                                                                        |    |                                                           |                                |
|---------------------------|----------------------------------|---------------------------------------------------------|-----------------------------|------------------------------------------------------------------------|----|-----------------------------------------------------------|--------------------------------|
|                           |                                  |                                                         |                             | Strawberry ( <i>F. x ananassa</i> ) and Raspberry ( <i>R. idaeus</i> ) | FG | Powdery mildews and red core                              |                                |
|                           |                                  |                                                         |                             | Potato ( <i>S. tuberosum</i> )                                         | FG | Late blight                                               |                                |
|                           |                                  |                                                         |                             | Carrot ( <i>Daucus carota</i> subsp. <i>sativus</i> )                  | FG | Powdery mildew                                            |                                |
| Mustard seeds powder      | Dry extract from plant tissues   | Water dispersible powder for slurry seed treatment (WS) | Fungicide                   | Weath seeds                                                            | F  | Common blunt ( <i>Tilletia</i> spp.)                      | Seed application before sowing |
| Onion oil                 | Food product                     | Oil dispersion (OD)                                     | Repellent and scent masking | Umbelliferous crops (e.g. carrots, celeriac, parsnip, parsley root)    | F  | Carrot root fly                                           | Evaporated from dispenser      |
| Salix spp. cortex         | Water extract from plant tissues | Dispersible concentrate (DC) from bark of Salix         | Fungicide                   | Fruit trees and peach trees                                            | F  | Foliar fungi (e.g. <i>Taphrina deformans</i> )            | Seed application before sowing |
|                           |                                  |                                                         |                             | Apple trees ( <i>Malus</i> spp.)                                       | F  | Scab disease and powdery mildew                           |                                |
|                           |                                  |                                                         |                             | Grapevine ( <i>V. vinifera</i> )                                       | F  | Downy and powdery mildews                                 |                                |
| Sodium chloride           | Inorganic salt                   | Water soluble powder (SP)                               | Fungicide                   | Grapevine ( <i>V. vinifera</i> )                                       | F  | Powdery mildew                                            | Foliar application             |
|                           |                                  | Granule (GR)                                            |                             | Mushrooms (e.g. <i>Agaricus bisporus</i> )                             | G  | Fungal diseases                                           |                                |
|                           |                                  | Water soluble powder (SP)                               | Insecticide                 | Grapevine ( <i>V. vinifera</i> )                                       | F  | European grapevine moth                                   |                                |
|                           |                                  |                                                         | Herbicide                   | Salt swamps and salt marshes                                           | F  | <i>Baccharis halimifolia</i>                              |                                |
| Sodium hydrogen carbonate | Inorganic salt                   | Water soluble powder (SP)                               | Fungicide                   | Vegetables, soft fruits and ornamentals                                | FG | Mildews (e.g. <i>Sphaerotheca</i> and <i>Oidium</i> spp.) | Foliar application             |

|                    |                                  |                              |                |                                                                                                                   |    |                                                      |                                           |
|--------------------|----------------------------------|------------------------------|----------------|-------------------------------------------------------------------------------------------------------------------|----|------------------------------------------------------|-------------------------------------------|
|                    |                                  |                              |                | Grapevine ( <i>V. vinifera</i> )                                                                                  | F  | Powdery mildew                                       | Dipping or surface treatment              |
|                    |                                  |                              |                | Apple trees ( <i>Malus spp.</i> )                                                                                 | F  | Apple scab                                           |                                           |
|                    |                                  |                              |                | Fruits (e.g. oranges, cherries, apples, papaya)                                                                   | FI | Storage diseases (e.g. <i>Penicillium spp.</i> )     |                                           |
|                    |                                  | Granule (GR)                 | Herbicide      | Potted plants                                                                                                     | G  | Liverwort, bryophyte and green thallus of liverwort) | Direct application                        |
| Sucrose            | Disaccharide                     | Water soluble powder (SP)    | Plant elicitor | Apple trees ( <i>Malus spp.</i> )                                                                                 | F  | Fruits borer like Codling moth                       | Foliar application (early in the morning) |
|                    |                                  |                              |                | Maize ( <i>Zea mays</i> )                                                                                         | F  | Corn borer                                           |                                           |
|                    |                                  |                              |                | Grapevine ( <i>V. vinifera</i> )                                                                                  | F  | Vine leafhopper and downy mildew                     |                                           |
| Sunflower oil      | Food product                     | Oil dispersion (OD)          | Fungicide      | Tomato ( <i>S. lycopersicum</i> )                                                                                 | F  | Powdery mildew                                       | Foliar application                        |
| Talc E553B         | Silicate mineral                 | Wettable powder (WP)         | Fungifuge      | Grapevine ( <i>V. vinifera</i> )                                                                                  | F  | Powdery mildew                                       | Spray application                         |
|                    |                                  |                              |                | Apple ( <i>Malus spp.</i> ) and Pear ( <i>Pyrus spp.</i> ) tree                                                   | F  | Apple scab                                           |                                           |
|                    |                                  |                              | Insectifuge    | Fruit trees ( <i>Malus, Pyrus spp.</i> ) and Olive tree ( <i>O. europea</i> )                                     | F  | Insects and mites                                    |                                           |
| <i>Urtica spp.</i> | Water extract from plant tissues | Dispersible concentrate (DC) | Insecticide    | Fruit trees ( <i>Malus, Pyrus spp.</i> ), redcurrant ( <i>R. rubrum</i> ) and walnut tree ( <i>Juglans spp.</i> ) | F  | Aphids                                               | Foliar or direct application              |
|                    |                                  |                              |                | Bean ( <i>Phaseolus vulgaris</i> )                                                                                | F  |                                                      |                                           |
|                    |                                  |                              |                | Potato ( <i>S. tuberosum</i> )                                                                                    | F  |                                                      |                                           |

|         |              |                                |           |                                                                                   |   |                                                      |                              |
|---------|--------------|--------------------------------|-----------|-----------------------------------------------------------------------------------|---|------------------------------------------------------|------------------------------|
|         |              |                                |           | Leaf vegetables (e.g. <i>Lactuca spp.</i> ) and cabbages ( <i>Brassica spp.</i> ) | F |                                                      |                              |
|         |              |                                |           | Elder tree ( <i>Sambucus racemosa</i> )                                           | F |                                                      |                              |
|         |              |                                |           | Rose ( <i>Rosa spp.</i> )                                                         | F |                                                      |                              |
|         |              |                                |           | <i>Spiraea spp.</i>                                                               | F |                                                      |                              |
|         |              |                                |           | Brassicaceae ( <i>Brassica spp.</i> )                                             | F | Fleabeetle and diamond back moth                     | Foliar application           |
|         |              |                                |           | Apple tree ( <i>Malus domestica</i> ) and Peer tree ( <i>Pyrus communis</i> )     | F | Codling moth                                         |                              |
|         |              |                                | Acaricide | Bean ( <i>P. vulgaris</i> )                                                       | F | Two-spotted spider mite                              |                              |
|         |              |                                |           | Grapevine ( <i>V. vinifera</i> )                                                  | F | Two-spotted spider mite                              |                              |
|         |              |                                | Fungicide | Brassicaceae (mustard family)                                                     | F | Alternaria spp.                                      | Foliar and fruit application |
|         |              |                                |           | Cucumber ( <i>C. sativus</i> )                                                    | F | Alternaria spp. and powdery mildew                   |                              |
|         |              |                                |           | Fruit trees (e.g. Apple, Plum, Peach and Sweet cherry tree)                       | F | Leaf spot, brown rot, grey mold and black bread mold |                              |
|         |              |                                |           | Grapevine ( <i>V. vinifera</i> )                                                  | F | Downy mildew                                         |                              |
|         |              |                                |           | Potato ( <i>S. tuberosum</i> )                                                    | F | Late blight                                          |                              |
| Vinegar | Food product | Liquid for seed treatment (LS) | Fungicide | Wheat ( <i>Triticum spp.</i> ) seeds                                              | F | Common blunt (e.g. <i>Tilletia spp.</i> )            | Seed treatment before sowing |
|         |              |                                |           | Barley ( <i>Hordeum vulgare</i> ) seeds                                           | F | Barley leaf stripe                                   |                              |

|      |              |                                                          |                        |                                                                                                                                       |    |                                         |                                            |
|------|--------------|----------------------------------------------------------|------------------------|---------------------------------------------------------------------------------------------------------------------------------------|----|-----------------------------------------|--------------------------------------------|
|      |              |                                                          |                        | Market vegetables                                                                                                                     | F  | Alternaria spp.                         |                                            |
|      |              |                                                          |                        | Market vegetables                                                                                                                     | FG | Bacterial borne diseases                |                                            |
|      |              | Liquid for disinfection of mechanical cutting tools (LS) | Bactericide            | White and red chestnut and Acer spp.                                                                                                  | F  | Pseudomonas syringae pv aesculi         | Tools application before sawing or cutting |
|      |              |                                                          |                        | Ornamental plants                                                                                                                     | F  | Fire blight                             |                                            |
|      |              |                                                          |                        |                                                                                                                                       | F  | Bacterial blight/canker                 |                                            |
|      |              |                                                          |                        | Plane ( <i>Platanus</i> spp.), <i>Prunus</i> spp., Chestnut ( <i>Aesculus</i> spp.), <i>Sophora</i> spp., Linden ( <i>Tilia</i> spp.) | F  | Rot fungi                               |                                            |
|      |              |                                                          |                        | Elm tree ( <i>Ulmus</i> spp.)                                                                                                         | F  | Vascular fungi ( <i>Opiostoma</i> spp.) |                                            |
|      |              |                                                          | Fungicide              | Maple tree ( <i>Acer</i> spp.)                                                                                                        | F  | Wilt disease                            |                                            |
|      |              |                                                          |                        | <i>Ailanthus altissima</i>                                                                                                            | F  | <i>Verticillium</i> spp.                |                                            |
|      |              |                                                          |                        | Maple ( <i>Acer</i> spp.), chestnut ( <i>Aesculus</i> spp.) and beech ( <i>Fagus</i> spp.)                                            | F  | Sooty-Bark disease                      |                                            |
| Whey | Food product | In water solution                                        | Fungicide and virucide | Cucumber ( <i>C. sativus</i> ) and Zucchini squash ( <i>C. pepo</i> )                                                                 | G  | Powdery mildews                         | Spray application                          |
|      |              |                                                          |                        | Grapevine ( <i>V. vinifera</i> )                                                                                                      | F  | Powdery mildew                          |                                            |
|      |              |                                                          |                        | Tomato ( <i>S. lycopersicum</i> )                                                                                                     | FG | Tomato yellow leaf curl virus           |                                            |
|      |              |                                                          |                        | Glove fingertips and mechanical cutting tools                                                                                         |    | Viruses                                 | Dipping                                    |

<sup>a</sup> Outdoor or field use (F), greenhouse application (G) or indoor application (I).
